# Supplementary material for: Machine Learning Analysis of the Anatomical Parameters of the Upper Airway Morphology: A Retrospective Study from Cone-Beam CT Examinations in a French Population
Source: MDPI journal article supplement (doi:10.3390/jcm12010084), 2022-12-22
Supplement: s1 [file s1]

## Supplementary Text

### Supplementary Text S1: Protocol under Avizo 8.1.

#### 1. Orientation

The anonymized scan data were opened using Avizo 8.1 and visualized using the orthoslice tool (values between -500 and 2000), and the isosurface tool (threshold from 500 to 600). First, the scans were re-oriented according to the Frankfort plane, defined by three anatomic landmarks (rPo, rOr and lOr).

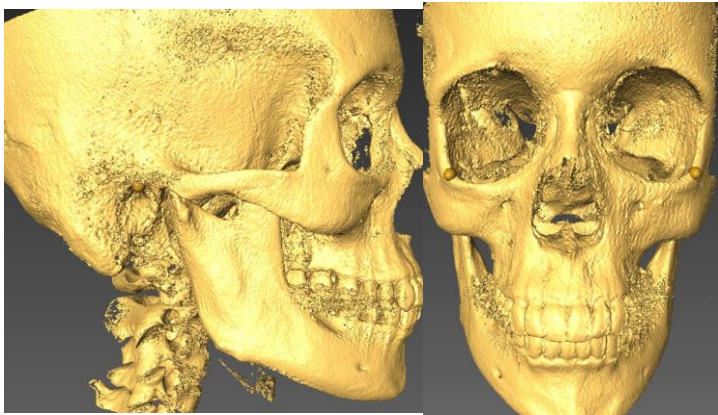

Position of three anatomic landmarks on the isosurface (rPo, rOr, lOr).

Second, the scans were re-oriented according to the midsagittal plane, defined by three anatomic landmarks (Na, ANS and MGNM).

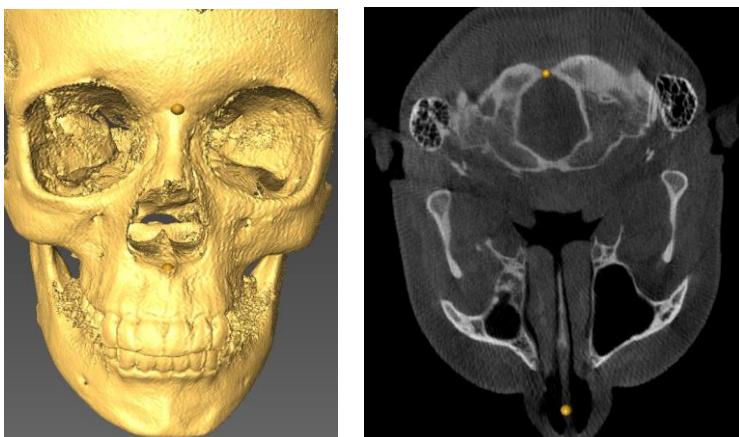

Position of 3 landmarks on the isosurface and orthoslice (Na, ANS, FM).

#### 2. Volume Segmentation

The segmentation was performed semi-automatically using the software tool “Image Segmentation - Edit New label field”. The threshold tool was adjusted to around 440, and the upper and lower boundaries of the upper airway were placed on the midsagittal orthoslice. Then, the upper airway was selected on the sagittal view. The cross-sectional areas were computed using the tool “measure and analysis” and the minimal value was considered (CSA<sub>min</sub>). The corresponding slice of the airway was used to compute the width and the length.

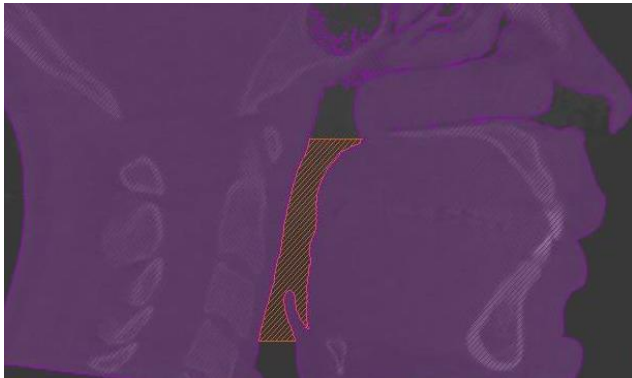

**Volume segmentation of the upper airway in the sagittal plane.**

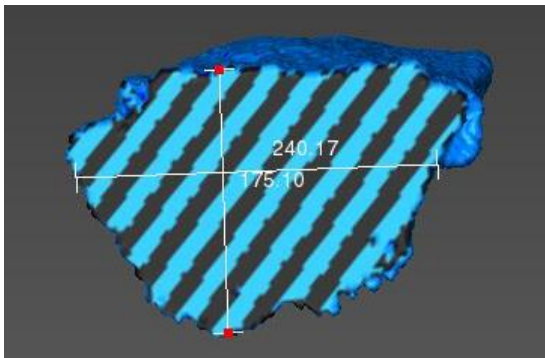

**Length (anteroposterior) and width (lateral) of the CSA<sub>min</sub>**

### **3. Anatomical landmarks**

Using the software tool “Create object – Landmarks”, the observer placed all the anatomical landmarks in the same order (from 1 to 24) using the three orthoslices (midsagittal, axial and frontal views) and the isosurface.

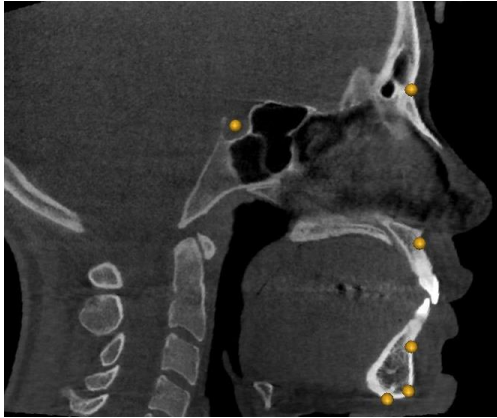

**Na, Pg, S, A, B and Me**

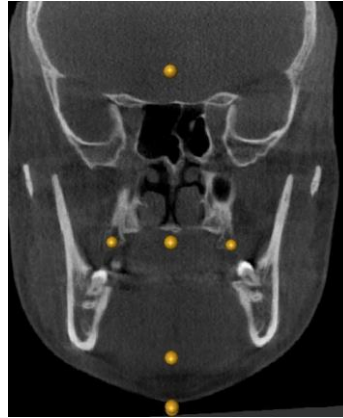

**rTb and ITb**

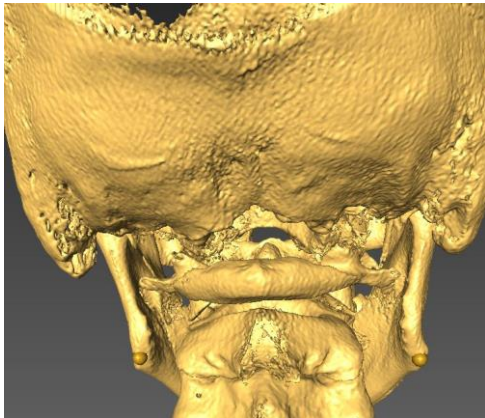

**rGo and lGo**

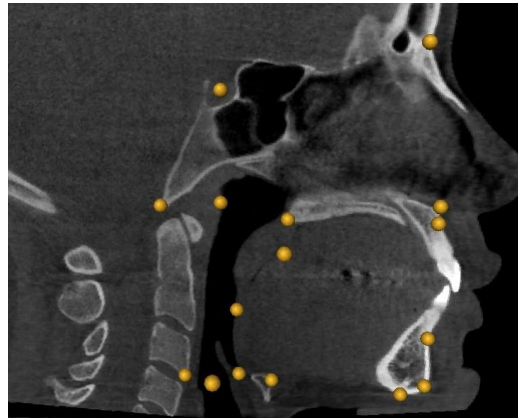

**PNS, ANS, BEP, TUV, Ba, Tph, H and C3**

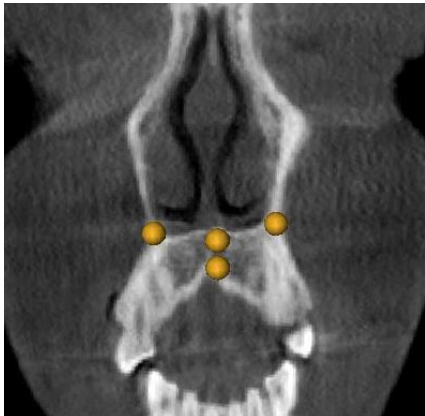

**rCN, lCN**

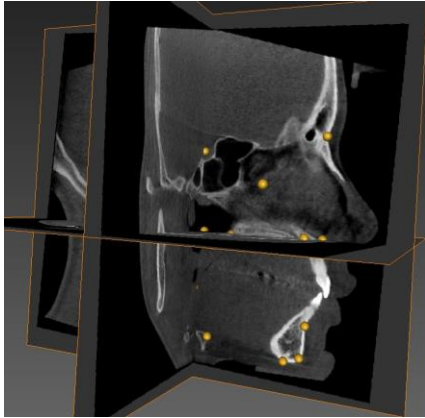

**LP** at the intersection of the three planes: midsagittal plane; axial plane passing through the PNS-ANS; frontal plane on the most posterior part of the soft palate

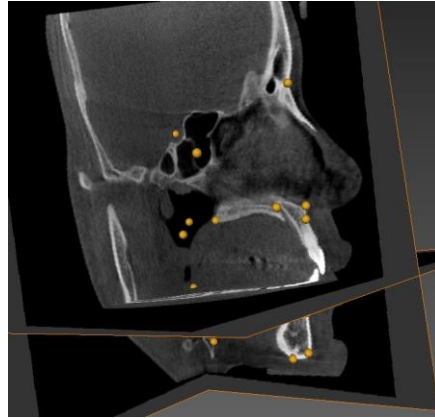

**VSP** at the intersection of the three planes: midsagittal plane; axial plane passing through the TUV; frontal plane on the most posterior part of the soft palate

**Positioning of some landmarks.**

## Supplementary Text S2: Normalized fitness-weighted variable importance and magnitude of effects

### ***Definition of the normalized fitness-weighted variable importance***

Fitness-weighted variable importance FWI is calculated using all models. It first uniformly distributes the fitness (mean absolute error) of each model  $M = \{j = 1, \dots, m\}$  over all  $d$  variables present in it ( $\delta(ki, Mj)$ ). Then, it sums up the scores over all models.

$$FWI (xi, M) = \sum_{j=1}^m \frac{fitness(Mj)}{\sum_{i=1}^d \delta(ki, Mj)} \delta(ki, Mj)$$

The normalized fitness-weighted variable importance NFWI was used.

$$NFWI (xi, M) = \frac{FWI (xi, M)}{\sum_i FWI(ki, M)} \cdot 100\%$$

### ***Definition of the magnitude of effects***

For a model equation of the form  $z = f(x, y \dots)$ , the positive magnitude is defined as  $\left| \frac{\partial z}{\partial x} \right| \cdot \frac{\sigma x}{\sigma z}$ , at all points where  $\frac{\partial z}{\partial x} > 0$  and the negative magnitude as  $\left| \frac{\partial z}{\partial x} \right| \cdot \frac{\sigma x}{\sigma z}$ , at all points where  $\frac{\partial z}{\partial x} < 0$ .

$\frac{\partial z}{\partial x}$  is the partial derivative of  $z$  with respect to  $x$ ,

$\sigma x$  is the standard deviation of  $x$  in the input data,

$\sigma z$  is the standard deviation of  $z$

The mean magnitude of effects for each contributing variable was computed from the best model equation of each experiment. Magnitude of effects means that when the variable increases, there is an increase (positive magnitude) or a decrease (negative magnitude) in the target variable.

**Supplementary Table S1:** Results for the symbolic regression analysis of CSAmin. Metrics associated for each solution found for each of the 10 experiments in Eureka software.

**Experiment 1**

| R <sup>2</sup><br>Goodness of<br>Fit | Correlation<br>Coefficient | Maximum<br>Error | Mean<br>Squared<br>Error | Mean Absolute<br>Error | Complexity | Fit  | Solution                                                                                                                                                   |
|--------------------------------------|----------------------------|------------------|--------------------------|------------------------|------------|------|------------------------------------------------------------------------------------------------------------------------------------------------------------|
| 0.55                                 | 0.80                       | 100              | 3377                     | 46                     | 15         | 0.57 | CSA = 206 + 122*(0.025 + 0.0856*((distanceNa-ANS) - 50.3) - 0.1111*((distancePNS-LP) - 19.07) - 0.0162*((distanceNa-ANS) - 50.32)*((angleS-Na-A) - 81.77)) |
| 0.56                                 | 0.80                       | 105              | 3302                     | 47                     | 13         | 0.58 | CSA = 206 + 122*(0.0706*((distanceNa-ANS) - 50) - 0.11*((distancePNS-LP) - 19) - 0.0162*((distanceNa-ANS) - 50)*((angleS-Na-A) - 81))                      |
| 0.44                                 | 0.67                       | 121              | 4273                     | 54                     | 7          | 0.67 | CSA = 206 + 122*(0.11*((distanceNa-ANS) - 50.3) - 0.132*((distancePNS-LP) - 19.1))                                                                         |
| 0.36                                 | 0.65                       | 174              | 4869                     | 55                     | 3          | 0.68 | CSA = 206 - 12.97*((distancePNS-LP) - 19.07)                                                                                                               |

**Experiment 2**

| R <sup>2</sup><br>Goodness of<br>Fit | Correlation<br>Coefficient | Maximum<br>Error | Mean<br>Squared<br>Error | Mean Absolute<br>Error | Complexity | Fit  | Solution                                                                                   |
|--------------------------------------|----------------------------|------------------|--------------------------|------------------------|------------|------|--------------------------------------------------------------------------------------------|
| 0.56                                 | 0.78                       | 104              | 3315                     | 50                     | 7          | 0.62 | CSA = 206 + 122*(0.0489*((anglerOr-rPo-Me-rGo) - 33.32) - 0.11*((distancePNS-LP) - 19.07)) |
| 0.36                                 | 0.65                       | 175              | 4841                     | 54                     | 3          | 0.67 | CSA = 206 - 13.37*((distancePNS-LP) - 19.07)                                               |

**Experiment 3**

| R <sup>2</sup><br>Goodness of<br>Fit | Correlation<br>Coefficient | Maximum<br>Error | Mean<br>Squared<br>Error | Mean Absolute<br>Error | Complexity | Fit  | Solution                                                               |
|--------------------------------------|----------------------------|------------------|--------------------------|------------------------|------------|------|------------------------------------------------------------------------|
| 0.34                                 | 0.62                       | 136              | 5023                     | 56                     | 11         | 0.69 | CSA = 62 + 10.99*(distanceC3-H) - 0.237*(distancePNS-LP)*(angleH-Na-S) |
| 0.47                                 | 0.74                       | 119              | 3976                     | 56                     | 8          | 0.69 | CSA = (distanceNa-ANS)*(angleS-Na-A)/(distancePNS-LP) - Age            |
| 0.41                                 | 0.64                       | 161              | 4449                     | 56                     | 7          | 0.69 | CSA = 471 - 0.257*(distancePNS-LP)*(angleH-Na-S)                       |
| 0.35                                 | 0.65                       | 167              | 4957                     | 58                     | 5          | 0.72 | CSA = 422 - 11.42*(distancePNS-LP)                                     |
| 0.30                                 | 0.63                       | 155              | 5272                     | 65                     | 4          | 0.80 | CSA = 3625/(distancePNS-LP)                                            |
| -0.03                                | 0.01                       | 144              | 7822                     | 78                     | 3          | 0.97 | CSA = 5.31*(distanceC3-H)                                              |

**Experiment 4**

| <b>R<sup>2</sup><br/>Goodness of<br/>Fit</b> | <b>Correlation<br/>Coefficient</b> | <b>Maximum<br/>Error</b> | <b>Mean<br/>Squared<br/>Error</b> | <b>Mean Absolute<br/>Error</b> | <b>Complexity</b> | <b>Fit</b> | <b>Solution</b>                    |
|----------------------------------------------|------------------------------------|--------------------------|-----------------------------------|--------------------------------|-------------------|------------|------------------------------------|
| 0.40                                         | 0.65                               | 166                      | 4569                              | 54                             | 5                 | 0.68       | CSA = 446 - 13.03*(distancePNS-LP) |
| 0.20                                         | 0.63                               | 178                      | 6047                              | 64                             | 4                 | 0.79       | CSA = 3985 /(distancePNS-LP)       |
| -0.02                                        | 0.14                               | 150                      | 7745                              | 78                             | 3                 | 0.97       | CSA = 2.09*(distanceNa-B)          |

*Experiment 5*

| <b>R<sup>2</sup><br/>Goodness of<br/>Fit</b> | <b>Correlation<br/>Coefficient</b> | <b>Maximum<br/>Error</b> | <b>Mean<br/>Squared<br/>Error</b> | <b>Mean Absolute<br/>Error</b> | <b>Complexity</b> | <b>Fit</b> | <b>Solution</b>                                     |
|----------------------------------------------|------------------------------------|--------------------------|-----------------------------------|--------------------------------|-------------------|------------|-----------------------------------------------------|
| 0.48                                         | 0.72                               | 131                      | 3953                              | 55                             | 7                 | 0.68       | CSA = 347 - 0.25*(distanceBEP-TUV)*(distancePNS-LP) |
| 0.38                                         | 0.65                               | 159                      | 4694                              | 58                             | 5                 | 0.72       | CSA = 412 - 11.27*(distancePNS-LP)                  |
| 0.26                                         | 0.63                               | 168                      | 5618                              | 64                             | 4                 | 0.79       | CSA = 3828/(distancePNS-LP)                         |
| -0.04                                        | 0.01                               | 148                      | 7878                              | 79                             | 3                 | 0.98       | CSA = 5.48*(distanceC3-H)                           |

*Experiment 6*

| <b>R<sup>2</sup><br/>Goodness of<br/>Fit</b> | <b>Correlation<br/>Coefficient</b> | <b>Maximum<br/>Error</b> | <b>Mean<br/>Squared<br/>Error</b> | <b>Mean Absolute<br/>Error</b> | <b>Complexity</b> | <b>Fit</b> | <b>Solution</b>                                 |
|----------------------------------------------|------------------------------------|--------------------------|-----------------------------------|--------------------------------|-------------------|------------|-------------------------------------------------|
| 0.41                                         | 0.64                               | 167                      | 4485                              | 55                             | 7                 | 0.68       | CSA = 484 - 0.27*(distancePNS-LP)*(angleH-Na-S) |
| 0.38                                         | 0.65                               | 162                      | 4706                              | 57                             | 5                 | 0.71       | CSA = 420 - 11.64*(distancePNS-LP)              |
| 0.30                                         | 0.63                               | 157                      | 5320                              | 64                             | 4                 | 0.80       | CSA = 3664 /(distancePNS-LP)                    |
| -0.04                                        | 0.01                               | 148                      | 7875                              | 79                             | 3                 | 0.98       | CSA = 5.47*(distanceC3-H)                       |

*Experiment 7*

| <b>R<sup>2</sup><br/>Goodness of<br/>Fit</b> | <b>Correlation<br/>Coefficient</b> | <b>Maximum<br/>Error</b> | <b>Mean<br/>Squared<br/>Error</b> | <b>Mean Absolute<br/>Error</b> | <b>Complexity</b> | <b>Fit</b> | <b>Solution</b>                                                            |
|----------------------------------------------|------------------------------------|--------------------------|-----------------------------------|--------------------------------|-------------------|------------|----------------------------------------------------------------------------|
| 0.54                                         | 0.83                               | 107                      | 3494                              | 51                             | 11                | 0.64       | CSA = 7.58*(distanceNa-ANS) - 41 - 0.26*(distanceBEP-TUV)*(distancePNS-LP) |
| 0.47                                         | 0.74                               | 119                      | 3976                              | 56                             | 8                 | 0.69       | CSA = (distanceNa-ANS)*(angleS-Na-A)/(distancePNS-LP) - Age                |
| 0.46                                         | 0.72                               | 116                      | 4053                              | 56                             | 7                 | 0.70       | CSA = 325 - 0.237*(distanceBEP-TUV)*(distancePNS-LP)                       |
| 0.32                                         | 0.64                               | 178                      | 5121                              | 57                             | 6                 | 0.71       | CSA = 4513/(distancePNS-LP) - Age                                          |

|      |      |     |      |    |   |      |                                   |
|------|------|-----|------|----|---|------|-----------------------------------|
| 0.39 | 0.65 | 158 | 4618 | 57 | 5 | 0.71 | CSA = 416 - 11.6*(distancePNS-LP) |
| 0.30 | 0.63 | 155 | 5274 | 65 | 4 | 0.80 | CSA = 3627/(distancePNS-LP)       |
| 0.00 | 0.44 | 150 | 7603 | 77 | 3 | 0.95 | CSA = 2.41*(angleS-Na-A)          |

#### Experiment 8

| R <sup>2</sup><br>Goodness of<br>Fit | Correlation<br>Coefficient | Maximum<br>Error | Mean<br>Squared<br>Error | Mean Absolute<br>Error | Complexity | Fit  | Solution                                                            |
|--------------------------------------|----------------------------|------------------|--------------------------|------------------------|------------|------|---------------------------------------------------------------------|
| 0.43                                 | 0.66                       | 124              | 4286                     | 53                     | 11         | 0.66 | CSA = (distanceNa-ANS)*sqrt((distanceNa-B)) - 15.1*(distancePNS-LP) |
| 0.38                                 | 0.64                       | 162              | 4675                     | 54                     | 7          | 0.67 | CSA = 4.85*(distanceNa-B) - 13.1*(distancePNS-LP)                   |
| 0.36                                 | 0.65                       | 171              | 4808                     | 55                     | 5          | 0.68 | CSA = 447 - 12.75*(distancePNS-LP)                                  |
| -0.02                                | 0.18                       | 157              | 7750                     | 75                     | 3          | 0.93 | CSA = 4.67*(angleH-S-Ba)                                            |

#### Experiment 9

| R <sup>2</sup><br>Goodness of<br>Fit | Correlation<br>Coefficient | Maximum<br>Error | Mean<br>Squared<br>Error | Mean Absolute<br>Error | Complexity | Fit  | Solution                          |
|--------------------------------------|----------------------------|------------------|--------------------------|------------------------|------------|------|-----------------------------------|
| 0.40                                 | 0.65                       | 170              | 4558                     | 52                     | 5          | 0.65 | CSA = 467 - 14.1*(distancePNS-LP) |
| 0.28                                 | 0.63                       | 161              | 5421                     | 64                     | 4          | 0.80 | CSA = 3729 /(distancePNS-LP)      |
| -0.02                                | 0.14                       | 149              | 7743                     | 78                     | 3          | 0.97 | CSA = 2.09*(distanceNa-B)         |

#### Experiment 10

| R <sup>2</sup><br>Goodness of<br>Fit | Correlation<br>Coefficient | Maximum<br>Error | Mean<br>Squared<br>Error | Mean Absolute<br>Error | Complexity | Fit  | Solution                          |
|--------------------------------------|----------------------------|------------------|--------------------------|------------------------|------------|------|-----------------------------------|
| 0.34                                 | 0.65                       | 179              | 5020                     | 55                     | 5          | 0.68 | CSA = 467 - 13.5*(distancePNS-LP) |
| 0.30                                 | 0.63                       | 155              | 5277                     | 65                     | 4          | 0.80 | CSA = 3629 /(distancePNS-LP)      |
| -0.02                                | 0.14                       | 149              | 7737                     | 78                     | 3          | 0.97 | CSA = 2.08*(distanceNa-B)         |



**Supplementary Table S2:** Results for the symbolic regression analysis of Volume. Metrics associated for each solution found for each of the 10 experiments in Eureqa.

**Experiment 1**

| <b>R<sup>2</sup><br/>Goodness of<br/>Fit</b> | <b>Correlation<br/>Coefficient</b> | <b>Maximum<br/>Error</b> | <b>Mean<br/>Squared<br/>Error</b> | <b>Mean Absolute<br/>Error</b> | <b>Complexity</b> | <b>Fit</b> | <b>Solution</b>                                                                                                                                                                                                                                                   |
|----------------------------------------------|------------------------------------|--------------------------|-----------------------------------|--------------------------------|-------------------|------------|-------------------------------------------------------------------------------------------------------------------------------------------------------------------------------------------------------------------------------------------------------------------|
| 0.67                                         | 0.85                               | 4967                     | 3932065                           | 1335                           | 27                | 0.48       | VOL = 14461 + 7336*(0.0527*((angleS-Na-A) - 81.77) + 0.0483*((distancePNS-VSP) - 36.18) + 0.0466*(distanceBEPA - 85.71) - 0.017*((distanceS-Na) - 66.2) - 0.0187*((distancerCN-ICN) - 20.52) - 0.0397*((angleH-Na-S) - 56.11) - 0.126*((distancePNS-LP) - 19.07)) |
| 0.55                                         | 0.75                               | 6050                     | 5358400                           | 1609                           | 21                | 0.57       | VOL = 14462 + 7336*(0.0421 + 0.0389*(distanceBEPA - 85.71) + 0.0322*((distancePNS-VSP) - 36.18) - 0.0305*((distanceS-Na) - 66.2) - 0.0543*((angleH-Na-S) - 56.11) - 0.146*((distancePNS-LP) - 19.07))                                                             |
| 0.52                                         | 0.73                               | 5365                     | 5676715                           | 1848                           | 19                | 0.66       | VOL = 14462 + 7336*(0.0625*(distanceBEPA - 85.71) + 0.056*((distancePNS-VSP) - 36.18) - 0.0549*((angleH-Na-S) - 56.11) - 0.071*((distanceS-Na) - 66.2) - 0.13*((distancePNS-LP) - 19.1))                                                                          |
| 0.26                                         | 0.66                               | 8313                     | 8817206                           | 1999                           | 17                | 0.71       | VOL = 14462 + 7336*(0.0279 + 0.0648*(distanceBEPA - 85.71) - 0.0363*((distanceS-Na) - 66.2) - 0.0791*((angleH-Na-S) - 56.11) - 0.181*((distancePNS-LP) - 19.07))                                                                                                  |
| 0.58                                         | 0.85                               | 4255                     | 5027672                           | 2011                           | 15                | 0.72       | VOL = 14462 + 7336*(0.0705*((angleS-Na-A) - 81.8) + 0.0553*((distancePNS-VSP) - 36.18) - 0.064*((angleH-Na-S) - 56.11) - 0.118*((distancePNS-LP) - 19.07))                                                                                                        |
| 0.29                                         | 0.62                               | 7137                     | 8439873                           | 2046                           | 5                 | 0.73       | VOL = 14462 + 7336*(-0.118 - 0.101*((distancePNS-LP) - 19.07))                                                                                                                                                                                                    |
| 0.12                                         | 0.62                               | 7973                     | 10406930                          | 2428                           | 3                 | 0.87       | VOL = 14462 - 732*((distancePNS-LP) - 19.0728775932203)                                                                                                                                                                                                           |

**Experiment 2**

| <b>R<sup>2</sup><br/>Goodness of<br/>Fit</b> | <b>Correlation<br/>Coefficient</b> | <b>Maximum<br/>Error</b> | <b>Mean<br/>Squared<br/>Error</b> | <b>Mean Absolute<br/>Error</b> | <b>Complexity</b> | <b>Fit</b> | <b>Solution</b>                                                                                                                                                                                    |
|----------------------------------------------|------------------------------------|--------------------------|-----------------------------------|--------------------------------|-------------------|------------|----------------------------------------------------------------------------------------------------------------------------------------------------------------------------------------------------|
| 0.68                                         | 0.84                               | 3510                     | 3803659                           | 1576                           | 21                | 0.56       | VOL = 14462 + 7336*(0.0706*((angleS-Na-A) - 81.77) + 0.049*(distanceBEPA - 85.71) + 0.0235*((distanceBa-Tph) - 18.36) - 0.225 - 0.0899*((angleH-Na-S) - 56.11) - 0.142*((distancePNS-LP) - 19.07)) |
| 0.63                                         | 0.83                               | 4028                     | 4403061                           | 1619                           | 19                | 0.58       | VOL = 14461 + 7336*(0.0737*((distancePNS-VSP) - 36.18) + 0.0487*((distanceMe-H) - 41.96) - 0.062*((angleH-Na-S) - 56.11) - 0.0773*((distanceS-Na) - 66.2) - 0.127*((distancePNS-LP) - 19.07))      |
| 0.50                                         | 0.73                               | 5419                     | 5984826                           | 1986                           | 15                | 0.71       | VOL = 14462 + 7336*(0.058*(distanceBEPA - 85.71) + 0.0438*((distancePNS-VSP) - 36.2) - 0.0539*((distanceS-Na) - 66.2) - 0.141*((distancePNS-LP) - 19.1))                                           |
| 0.29                                         | 0.63                               | 7629                     | 8450677                           | 2081                           | 9                 | 0.74       | VOL = 14462 + 7336*(0.038*(distanceBEPA - 85.71) - 0.0787 - 0.14*((distancePNS-LP) - 19.1))                                                                                                        |

|      |      |      |          |      |   |      |                                                                  |
|------|------|------|----------|------|---|------|------------------------------------------------------------------|
| 0.25 | 0.62 | 7380 | 8834290  | 2145 | 5 | 0.77 | $VOL = 14462 + 7336*(-0.0974 - 0.105*((distancePNS-LP) - 19.1))$ |
| 0.12 | 0.62 | 8001 | 10439190 | 2439 | 3 | 0.87 | $VOL = 14462 - 741*((distancePNS-LP) - 19.1)$                    |

### Experiment 3

| R <sup>2</sup><br>Goodness of<br>Fit | Correlation<br>Coefficient | Maximum<br>Error | Mean<br>Squared<br>Error | Mean Absolute<br>Error | Complexity | Fit  | Solution                                                                      |
|--------------------------------------|----------------------------|------------------|--------------------------|------------------------|------------|------|-------------------------------------------------------------------------------|
| 0.65                                 | 0.84                       | 5103             | 4174416                  | 1243                   | 11         | 0.44 | $VOL = 4.84*distanceBEPA*(angleS-Na-A) - 19.2*(distancePNS-LP)*(angleH-Na-S)$ |
| 0.45                                 | 0.78                       | 6167             | 6549372                  | 2047                   | 9          | 0.73 | $VOL = 6.32*(distanceNa-ANS)*(angleS-Na-A) - 644*(distancePNS-LP)$            |
| 0.27                                 | 0.62                       | 7141             | 8631121                  | 2083                   | 5          | 0.74 | $VOL = 26395 - 656*(distancePNS-LP)$                                          |
| 0.26                                 | 0.57                       | 7043             | 8812454                  | 2102                   | 4          | 0.75 | $VOL = 251783/(distancePNS-LP)$                                               |
| 0.20                                 | 0.69                       | 6350             | 9526165                  | 2355                   | 3          | 0.84 | $VOL = 164*(angleS-Na-B)$                                                     |

### Experiment 4

| R <sup>2</sup><br>Goodness of<br>Fit | Correlation<br>Coefficient | Maximum<br>Error | Mean<br>Squared<br>Error | Mean Absolute<br>Error | Complexity | Fit  | Solution                                                                                                                   |
|--------------------------------------|----------------------------|------------------|--------------------------|------------------------|------------|------|----------------------------------------------------------------------------------------------------------------------------|
| 0.77                                 | 0.89                       | 3564             | 2671211                  | 1144                   | 17         | 0.41 | $VOL = 5591 + 0.117*distanceBEPA*(distancePNS-VSP)*(angleS-Na-A) - 0.549*(distancePNS-LP)*(distancePNS-VSP)*(angleH-Na-S)$ |
| 0.69                                 | 0.84                       | 4721             | 3694196                  | 1254                   | 11         | 0.45 | $VOL = 4.47*distanceBEPA*(angleS-Na-A) - 16.93*(distancePNS-LP)*(angleH-Na-S)$                                             |
| 0.40                                 | 0.64                       | 5572             | 7065973                  | 1947                   | 9          | 0.70 | $VOL = 15762 + 356*(distancePNS-VSP) - 807*(distancePNS-LP)$                                                               |
| 0.29                                 | 0.57                       | 6735             | 8433744                  | 2029                   | 4          | 0.72 | $VOL = 246920/(distancePNS-LP)$                                                                                            |

### Experiment 5

| R <sup>2</sup><br>Goodness of<br>Fit | Correlation<br>Coefficient | Maximum<br>Error | Mean<br>Squared<br>Error | Mean Absolute<br>Error | Complexity | Fit  | Solution                                                                                    |
|--------------------------------------|----------------------------|------------------|--------------------------|------------------------|------------|------|---------------------------------------------------------------------------------------------|
| 0.71                                 | 0.86                       | 4330             | 3459661                  | 1151                   | 15         | 0.41 | $VOL = distanceBEPA*(angleS-Na-A)*log((angleS-Na-A)) - 16.6*(distancePNS-LP)*(angleH-Na-S)$ |
| 0.66                                 | 0.84                       | 4907             | 3983724                  | 1267                   | 11         | 0.45 | $VOL = 4.78*distanceBEPA*(angleS-Na-A) - 18.9*(distancePNS-LP)*(angleH-Na-S)$               |
| 0.50                                 | 0.79                       | 5991             | 5902769                  | 1929                   | 9          | 0.69 | $VOL = 6.64*(distanceNa-ANS)*(angleS-Na-A) - 738*(distancePNS-LP)$                          |
| 0.27                                 | 0.57                       | 6939             | 8669793                  | 2072                   | 4          | 0.74 | $VOL = 250142/(distancePNS-LP)$                                                             |
| 0.11                                 | 0.75                       | 6740             | 10537413                 | 2367                   | 3          | 0.85 | $VOL = 164*(angleS-Na-A)$                                                                   |

**Experiment 6**

| <b>R<sup>2</sup><br/>Goodness of<br/>Fit</b> | <b>Correlation<br/>Coefficient</b> | <b>Maximum<br/>Error</b> | <b>Mean<br/>Squared<br/>Error</b> | <b>Mean Absolute<br/>Error</b> | <b>Complexity</b> | <b>Fit</b> | <b>Solution</b>                                                                                                                                                                                             |
|----------------------------------------------|------------------------------------|--------------------------|-----------------------------------|--------------------------------|-------------------|------------|-------------------------------------------------------------------------------------------------------------------------------------------------------------------------------------------------------------|
| 0.69                                         | 0.86                               | 4673                     | 3673672                           | 1371                           | 30                | 0.49       | $VOL = 43.4 * (distancePNS-LP) * (distancePNS-VSP) + 7.56 * (distanceNa-ANS) * (angleS-Na-A) + 110 / ((distanceBEP-TUV) - 34.48) - 25850 - 0.0281 * (distancePNS-VSP) * (angleH-Na-S) * (distancePNS-LP)^2$ |
| 0.63                                         | 0.80                               | 4421                     | 4348239                           | 1531                           | 19                | 0.55       | $VOL = 397 * (distancePNS-VSP) + 9.75 * (distanceNa-ANS) * (angleS-Na-A) - 691 * (distancePNS-LP) - 9.75 * (distanceNa-ANS) * (angleH-Na-S)$                                                                |
| 0.64                                         | 0.82                               | 5026                     | 4309244                           | 1537                           | 15                | 0.55       | $VOL = 13336 + 8.73 * (distanceNa-ANS) * (angleS-Na-A) - 395 * (angleH-Na-S) - 722 * (distancePNS-LP)$                                                                                                      |
| 0.41                                         | 0.77                               | 6977                     | 7045535                           | 1859                           | 13                | 0.66       | $VOL = 11.4 * (distanceNa-ANS) * (angleS-Na-A) - 374 * (angleH-Na-S) - 66924629 * (distancePNS-LP)$                                                                                                         |
| 0.49                                         | 0.79                               | 6036                     | 6055235                           | 1978                           | 9                 | 0.71       | $VOL = 6.45 * (distanceNa-ANS) * (angleS-Na-A) - 687 * (distancePNS-LP)$                                                                                                                                    |
| 0.30                                         | 0.61                               | 6231                     | 8315574                           | 2028                           | 7                 | 0.72       | $VOL = 27339 - 13.63 * (distancePNS-LP) * (angleH-Na-S)$                                                                                                                                                    |
| 0.27                                         | 0.57                               | 6969                     | 8709362                           | 2081                           | 4                 | 0.74       | $VOL = 250615 / (distancePNS-LP)$                                                                                                                                                                           |

**Experiment 7**

| <b>R<sup>2</sup><br/>Goodness of<br/>Fit</b> | <b>Correlation<br/>Coefficient</b> | <b>Maximum<br/>Error</b> | <b>Mean<br/>Squared<br/>Error</b> | <b>Mean Absolute<br/>Error</b> | <b>Complexity</b> | <b>Fit</b> | <b>Solution</b>                                                                                                             |
|----------------------------------------------|------------------------------------|--------------------------|-----------------------------------|--------------------------------|-------------------|------------|-----------------------------------------------------------------------------------------------------------------------------|
| 0.70                                         | 0.86                               | 4094                     | 3587847                           | 1359                           | 21                | 0.49       | $VOL = 385 * (distancePNS-VSP) + 7.31 * (distanceNa-ANS) * (angleS-Na-A) - 427 * (angleH-Na-S) - 0.73 * (distancePNS-LP)^3$ |
| 0.61                                         | 0.83                               | 4867                     | 4618997                           | 1549                           | 11                | 0.55       | $VOL = 7.24 * (distanceNa-ANS) * (angleS-Na-A) - 15.31 * (distancePNS-LP) * (angleH-Na-S)$                                  |
| 0.44                                         | 0.68                               | 5427                     | 6683090                           | 1750                           | 7                 | 0.63       | $VOL = -20.16 * (distancePNS-VSP) * ((distancePNS-LP) - 37.02)$                                                             |
| 0.30                                         | 0.57                               | 6540                     | 8261943                           | 2015                           | 4                 | 0.72       | $VOL = 243823 / (distancePNS-LP)$                                                                                           |

**Experiment 8**

| <b>R<sup>2</sup><br/>Goodness of<br/>Fit</b> | <b>Correlation<br/>Coefficient</b> | <b>Maximum<br/>Error</b> | <b>Mean<br/>Squared<br/>Error</b> | <b>Mean Absolute<br/>Error</b> | <b>Complexity</b> | <b>Fit</b> | <b>Solution</b>                                                                                                                                                          |
|----------------------------------------------|------------------------------------|--------------------------|-----------------------------------|--------------------------------|-------------------|------------|--------------------------------------------------------------------------------------------------------------------------------------------------------------------------|
| 0.67                                         | 0.84                               | 5759                     | 3860003                           | 1183                           | 23                | 0.42       | $VOL = 142 * (angleS-Na-A) + 6.86 * (distanceMe-H) * (anglerOr-rPo-Me-rGo) + 4.22 * (distancePNS-VSP) * (angleS-Na-A) - 1685 - 16.57 * (distancePNS-LP) * (angleH-Na-S)$ |
| 0.65                                         | 0.82                               | 5592                     | 4196326                           | 1238                           | 13                | 0.44       | $VOL = 6982 + 3.58 * distanceBEPA * (angleS-Na-A) - 17.32 * (distancePNS-LP) * (angleH-Na-S)$                                                                            |

|      |      |      |          |      |    |      |                                                                                                   |
|------|------|------|----------|------|----|------|---------------------------------------------------------------------------------------------------|
| 0.68 | 0.84 | 4726 | 3736811  | 1247 | 11 | 0.45 | $VOL = 4.58 * distanceBEP A * (angleS - Na - A) - 17.73 * (distancePNS - LP) * (angleH - Na - S)$ |
| 0.42 | 0.79 | 6317 | 6903761  | 1744 | 9  | 0.62 | $VOL = 4.56 * distanceBEP A * (angleS - Na - A) - 962 * (distancePNS - LP)$                       |
| 0.34 | 0.61 | 6549 | 7774770  | 1876 | 7  | 0.67 | $VOL = 26553 - 12.1 * (distancePNS - LP) * (angleH - Na - S)$                                     |
| 0.30 | 0.62 | 7051 | 8314175  | 2021 | 5  | 0.72 | $VOL = 27528 - 734 * (distancePNS - LP)$                                                          |
| 0.25 | 0.57 | 7077 | 8863189  | 2111 | 4  | 0.75 | $VOL = 252328 / (distancePNS - LP)$                                                               |
| 0.07 | 0.75 | 6893 | 10994172 | 2394 | 3  | 0.86 | $VOL = 166 * (angleS - Na - A)$                                                                   |

### Experiment 9

| R <sup>2</sup><br>Goodness of<br>Fit | Correlation<br>Coefficient | Maximum<br>Error | Mean<br>Squared<br>Error | Mean Absolute<br>Error | Complexity | Fit  | Solution                                                                                                                                                                                       |
|--------------------------------------|----------------------------|------------------|--------------------------|------------------------|------------|------|------------------------------------------------------------------------------------------------------------------------------------------------------------------------------------------------|
| 0.73                                 | 0.87                       | 4582             | 3175009                  | 1189                   | 23         | 0.42 | $VOL = 9.55 * distanceBEP A * (distancePNS - VSP) + 6.06 * (distanceNa - ANS) * (angleS - Na - A) - 395 * (angleH - Na - S) - 0.31 * distanceBEP A * (distancePNS - LP) * (distancePNS - VSP)$ |
| 0.74                                 | 0.86                       | 4147             | 3046593                  | 1243                   | 21         | 0.44 | $VOL = 282 * (angleS - Na - A) + 11 * distanceBEP A * (distancePNS - VSP) - 441 * (angleH - Na - S) - 0.306 * distanceBEP A * (distancePNS - LP) * (distancePNS - VSP)$                        |
| 0.72                                 | 0.86                       | 4554             | 3342330                  | 1294                   | 19         | 0.46 | $VOL = 740 * (distancePNS - VSP) + 7.5 * (distanceNa - ANS) * (angleS - Na - A) - 476 * (angleH - Na - S) - 24.3 * (distancePNS - LP) * (distancePNS - VSP)$                                   |
| 0.68                                 | 0.84                       | 4621             | 3749244                  | 1321                   | 11         | 0.47 | $VOL = 4.62 * distanceBEP A * (angleS - Na - A) - 18.1 * (distancePNS - LP) * (angleH - Na - S)$                                                                                               |
| 0.57                                 | 0.82                       | 5407             | 5085265                  | 1801                   | 9          | 0.64 | $VOL = 349 * (angleS - Na - A) - 14.3 * (distancePNS - LP) * (angleH - Na - S)$                                                                                                                |
| 0.33                                 | 0.62                       | 6790             | 7976595                  | 1932                   | 5          | 0.69 | $VOL = 26720 - 699 * (distancePNS - LP)$                                                                                                                                                       |
| 0.25                                 | 0.57                       | 7062             | 8841476                  | 2107                   | 4          | 0.75 | $VOL = 252097 / (distancePNS - LP)$                                                                                                                                                            |
| 0.08                                 | 0.75                       | 6868             | 10915905                 | 2387                   | 3          | 0.85 | $VOL = 166 * (angleS - Na - A)$                                                                                                                                                                |

### Experiment 10

| R <sup>2</sup><br>Goodness of<br>Fit | Correlation<br>Coefficient | Maximum<br>Error | Mean<br>Squared<br>Error | Mean Absolute<br>Error | Complexity | Fit  | Solution                                                                                                             |
|--------------------------------------|----------------------------|------------------|--------------------------|------------------------|------------|------|----------------------------------------------------------------------------------------------------------------------|
| 0.70                                 | 0.86                       | 4380             | 3512579                  | 1142                   | 15         | 0.41 | $VOL = distanceBEP A * (angleS - Na - A) * \log((angleS - Na - A)) - 16.55 * (distancePNS - LP) * (angleH - Na - S)$ |
| 0.68                                 | 0.84                       | 4706             | 3759552                  | 1268                   | 11         | 0.45 | $VOL = 4.62 * distanceBEP A * (angleS - Na - A) - 18.02 * (distancePNS - LP) * (angleH - Na - S)$                    |
| 0.40                                 | 0.79                       | 6413             | 7084632                  | 1753                   | 9          | 0.63 | $VOL = 4.62 * distanceBEP A * (angleS - Na - A) - 981 * (distancePNS - LP)$                                          |
| 0.34                                 | 0.61                       | 6519             | 7813558                  | 1935                   | 7          | 0.69 | $VOL = 25552 - 11.1 * (distancePNS - LP) * (angleH - Na - S)$                                                        |
| 0.27                                 | 0.57                       | 6888             | 8605652                  | 2058                   | 4          | 0.74 | $VOL = 249341 / (distancePNS - LP)$                                                                                  |
| 0.07                                 | 0.75                       | 6911             | 11051944                 | 2400                   | 3          | 0.86 | $VOL = 166 * (angleS - Na - A)$                                                                                      |
